# Supplementary material for: Differential brain neuroimmune profiles and altered immune balance in autism spectrum disorder compared with psychotic disorder and neurotypical controls
Source: Research Square preprint supplement (doi:10.21203/rs.3.rs-9500684/v1), 2026-05-20
Supplement: Supplementary file 1 [file 0ddddb0305bef55993e51b4e.docx]

**Supplemental Table 1. Case information**

| Control | | | |  | Autism Spectrum Disorder | | | | |  | Psychotic Disorder | | | |
| --- | --- | --- | --- | --- | --- | --- | --- | --- | --- | --- | --- | --- | --- | --- |
| Case | Age (yr) | Sex | PMI (hr) |  | | Case | Age (yr) | Sex | PMI (hr) |  | Case | Age (yr) | Sex | PMI (hr) |
| Control-1 | 12 | M | 13 |  | | ASD-1 | 10 | M | - |  | Psychosis-1 | 19 | M | 25 |
| Control-2 | 13 | F | 17 |  | | ASD-2 | 11 | F | 13 |  | Psychosis-2 | 22 | M | 22 |
| Control-3 | 13 | M | 19 |  | | ASD-3 | 15 | M | - |  | Psychosis-3 | 23 | F | 28 |
| Control-4 | 15 | M | 16 |  | | ASD-4 | 18 | M | - |  | Psychosis-4 | 23 | M | 56 |
| Control-5 | 15 | M | 31 |  | | ASD-5 | 20 | M | 23 |  | Psychosis-5 | 25 | F | - |
| Control-6 | 16 | M | 19 |  | | ASD-6 | 20 | M | - |  | Psychosis-6 | 28 | M | 20 |
| Control-7 | 18 | F | 8 |  | | ASD-7 | 27 | M | 8 |  | Psychosis-7 | 28 | M | 19 |
| Control-8 | 19 | M | 14 |  | | ASD-8 | 30 | M | 20 |  | Psychosis-8 | 28 | F | 28 |
| Control-9 | 19 | M | 57 |  | | ASD-9 | 30 | M | 16 |  | Psychosis-9 | 29 | M | 23 |
| Control-10 | 20 | F | 35 |  | | ASD-10 | 38 | M | - |  | Psychosis-10 | 29 | M | 21 |
| Control-11 | 21 | M | 30 |  | | ASD-11 | 39 | M | 23 |  | Psychosis-11 | 30 | F | 24 |
| Control-12 | 22 | M | 18 |  | | ASD-12 | 39 | M | 14 |  | Psychosis-12 | 32 | M | 26 |
| Control-13 | 26 | M | 18 |  | | ASD-13 | 41 | F | - |  | Psychosis-13 | 35 | M | 34 |
| Control-14 | 27 | M | 36 |  | | ASD-14 | 43 | M | - |  | Psychosis-14 | 36 | M | 27 |
| Control-15 | 28 | M | 24 |  | | ASD-15 | 49 | F | 16 |  | Psychosis-15 | 36 | M | 30 |
| Control-16 | 30 | M | 20 |  | | ASD-16 | 65 | M | - |  | Psychosis-16 | 39 | M | 23 |
| Control-17 | 31 | M | 19 |  | | ASD-17 | 73 | M | - |  | Psychosis-17 | 42 | F | 32 |
| Control-18 | 31 | F | 17 |  | |  |  |  |  |  | Psychosis-18 | 43 | M | 30 |
| Control-19 | 32 | M | 32 |  | |  |  |  |  |  | Psychosis-19 | 46 | M | 32 |
| Control-20 | 33 | M | 24 |  | |  |  |  |  |  | Psychosis-20 | 49 | M | 46 |
| Control-21 | 37 | M | 34 |  | |  |  |  |  |  | Psychosis-21 | 49 | F | 32 |
| Control-22 | 38 | M | 25 |  | |  |  |  |  |  | Psychosis-22 | 54 | M | 24 |
| Control-23 | 39 | M | 14 |  | |  |  |  |  |  | Psychosis-23 | 55 | M | 45 |
| Control-24 | 39 | M | 24 |  | |  |  |  |  |  | Psychosis-24 | 55 | F | 33 |
| Control-25 | 44 | M | 23 |  | |  |  |  |  |  | Psychosis-25 | 56 | M | 27 |
| Control-26 | 46 | M | 24 |  | |  |  |  |  |  | Psychosis-26 | 60 | M | 27 |
| Control-27 | 46 | F | 20 |  | |  |  |  |  |  |  |  |  |  |
| Control-28 | 46 | M | 31 |  | |  |  |  |  |  |  |  |  |  |
| Control-29 | 49 | M | 31 |  | |  |  |  |  |  |  |  |  |  |
| -, not available; PMI, postmortem interval | | | | | | | | | | | | | | |
