# Supplementary material for: Differential brain neuroimmune profiles and altered immune balance in autism spectrum disorder compared with psychotic disorder and neurotypical controls
Source: Research Square preprint supplement (doi:10.21203/rs.3.rs-9500684/v1), 2026-05-20
Supplement: Supplementary file 2 [file 519a1f04438a15ff49f0405f.pdf]

| Analyte/TGF- $\beta$ 1 |                             | CTRL                   | ASD                    | Psychosis              |
|------------------------|-----------------------------|------------------------|------------------------|------------------------|
| EGF                    | Median=<br>IQR (25th-75th)= | 2.66#<br>(1.05-5.19)   | 2.53#<br>(1.1-7.4)     | 0.94<br>(0.19-2.39)    |
| Eotaxin                | Median=<br>IQR (25th-75th)= | 2.08<br>(1.19-3.04)    | 2.61<br>(1.24-4.79)    | 1.77<br>(0.99-4.32)    |
| FGF-2                  | Median=<br>IQR (25th-75th)= | 413.4<br>(257.3-566.3) | 649.6<br>(188.7-1,110) | 359.9<br>(160.3-623.2) |
| FLT-3L                 | Median=<br>IQR (25th-75th)= | 0.73*#<br>(0.36-0.99)  | 1.19#<br>(0.64-4.6)    | 0.36<br>(0.25-0.60)    |
| Fractalkine            | Median=<br>IQR (25th-75th)= | 9.22<br>(7.44-12.52)   | 11.12<br>(5.44-22.02)  | 10.89<br>(4.91-20.33)  |
| G-CSF                  | Median=<br>IQR (25th-75th)= | 0.39*#<br>(0.07-0.66)  | 1.29#<br>(0.41-2.82)   | 0.14<br>(0.03-0.28)    |
| GRO- $\alpha$          | Median=<br>IQR (25th-75th)= | 0.27#<br>(0.14-0.54)   | 0.35#<br>(0.25-1.14)   | 0.14<br>(0.09-0.24)    |
| IFN $\alpha$ 2         | Median=<br>IQR (25th-75th)= | 0.62<br>(0.19-1.06)    | 0.28<br>(0.11-0.71)    | 0.34<br>(0.16-1.19)    |
| IL-1 $\alpha$          | Median=<br>IQR (25th-75th)= | 1.09*<br>(0.5-1.79)    | 3.45#<br>(2.05-6.85)   | 1.04<br>(0.34-1.54)    |
| IL-1RA                 | Median=<br>IQR (25th-75th)= | 3.15#<br>(1.34-7.0)    | 4.89#<br>(2.44-10.84)  | 1.42<br>(0.68-2.41)    |
| IL-4                   | Median=<br>IQR (25th-75th)= | 0.04<br>(0.003-0.02)   | 0.006<br>(0.002-0.02)  | 0.006<br>(0.002-0.08)  |
| IL-5                   | Median=<br>IQR (25th-75th)= | 0.01<br>(0.003-0.02)   | 0.01<br>(0.003-0.03)   | 0.005<br>(0.002-0.01)  |
| IL-6                   | Median=<br>IQR (25th-75th)= | 0.16#<br>(0.03-92)     | 0.23#<br>(0.06-0.99)   | 0.03<br>(0.01-0.1)     |
| IL-8                   | Median=<br>IQR (25th-75th)= | 0.83#<br>(0.44-1.98)   | 1.39#<br>(0.52-3.08)   | 0.37<br>(0.15-0.80)    |
| IL-9                   | Median=<br>IQR (25th-75th)= | 0.30#<br>(0.11-0.60)   | 0.39#<br>(0.16-1.37)   | 0.12<br>(0.04-0.25)    |
| IL-10                  | Median=<br>IQR (25th-75th)= | 0.02<br>(0.01-0.03)    | 0.03<br>(0.01-0.06)    | 0.01<br>(0.01-0.04)    |
| IL-12 p70              | Median=<br>IQR (25th-75th)= | 0.02<br>(0.01-0.04)    | 0.03<br>(0.01-0.06)    | 0.01<br>(0.01-0.04)    |

|               |                             |                        |                        |                       |
|---------------|-----------------------------|------------------------|------------------------|-----------------------|
| IL-15         | Median=<br>IQR (25th-75th)= | 0.59<br>(0.30-1.21)    | 1.14#<br>(0.42-1.88)   | 0.45<br>(0.28-0.63)   |
| IL-17F        | Median=<br>IQR (25th-75th)= | 0.11<br>(0.06-0.14)    | 0.15<br>(0.09-0.34)    | 0.08<br>(0.03-0.15)   |
| IL-18         | Median=<br>IQR (25th-75th)= | 0.67*<br>(0.20-2.52)   | 14.51#<br>(3.68-31.62) | 0.46<br>(0.23-1.43)   |
| MCP-1         | Median=<br>IQR (25th-75th)= | 3.91<br>(2.64-7.3)     | 6.81#<br>(3.40-12.16)  | 3.19<br>(1.67-5.41)   |
| MCP-3         | Median=<br>IQR (25th-75th)= | 0.22<br>(0.16-0.43)    | 0.35<br>(0.15-0.98)    | 0.19<br>(0.12-0.30)   |
| M-CSF         | Median=<br>IQR (25th-75th)= | 112.8<br>(58.88-158.4) | 183.6#<br>(71.7-340.6) | 69.21<br>(40.0-142.2) |
| CXCL9         | Median=<br>IQR (25th-75th)= | 2.12*#<br>(1.05-4.87)  | 1.09<br>(0.34-1.64)    | 0.64<br>(0.44-1.56)   |
| MIP-1 $\beta$ | Median=<br>IQR (25th-75th)= | 0.18<br>(0.07-0.30)    | 0.07<br>(0.02-0.30)    | 0.08<br>(0.04-0.14)   |
| PDGF-AA       | Median=<br>IQR (25th-75th)= | 13.45<br>(5.96-20.85)  | 19.81<br>(4.12-30.0)   | 11.26<br>(4.98-27.25) |
| RANTES        | Median=<br>IQR (25th-75th)= | 2.93<br>(1.52-7.18)    | 2.69<br>(0.95-6.11)    | 3.87<br>(3.02-6.28)   |
| TGF- $\alpha$ | Median=<br>IQR (25th-75th)= | 0.45<br>(0.08-0.95)    | 0.41<br>(0.05-0.70)    | 0.15<br>(0.03-0.53)   |
| VEGF-A        | Median=<br>IQR (25th-75th)= | 0.25<br>(0.09-0.42)    | 0.18<br>(0.02-1.63)    | 0.11<br>(0.02-0.53)   |
| IP-10         | Median=<br>IQR (25th-75th)= | 0.04*<br>(0.04-0.15)   | 0.27#<br>(0.06-2.18)   | 0.08<br>(0.04-0.13)   |
| MDC           | Median=<br>IQR (25th-75th)= | 0.02<br>(0.01-0.04)    | 0.03<br>(0.01-0.04)    | 0.01<br>(0.01-0.04)   |

\* p<0.05 compared with ASD

# p<0.05 compared with psychosis
