# Supplementary material for: Differential brain neuroimmune profiles and altered immune balance in autism spectrum disorder compared with psychotic disorder and neurotypical controls
Source: Research Square preprint supplement (doi:10.21203/rs.3.rs-9500684/v1), 2026-05-20
Supplement: Supplementary file 3 [file 654539e18716e3ce4dfaf9f8.pdf]

| Analyte        |                             | CTRL                        | ASD                       | Psychosis                 |
|----------------|-----------------------------|-----------------------------|---------------------------|---------------------------|
| sCD40L         | Median=<br>IQR (25th-75th)= | 130.2<br>(66.59-350.7)      | 250.1<br>(155.6-469.9)    | 77.13<br>(61.94-262.0)    |
| EGF            | Median=<br>IQR (25th-75th)= | 113.1#<br>(97.36-121.7)     | 104.0<br>(52.5-141.0)     | 87.16<br>(20.49-107.1)    |
| Eotaxin        | Median=<br>IQR (25th-75th)= | 76.82#<br>(57.09-98.74)     | 73.83#<br>(54.15-86.58)   | 120.8<br>(101.4-146.9)    |
| FGF-2          | Median=<br>IQR (25th-75th)= | 14,955*#<br>(11,091-23,644) | 20,048<br>(16,362-29,261) | 20,914<br>(14,976-27,417) |
| FLT-3L         | Median=<br>IQR (25th-75th)= | 22.94*<br>(14.88-36.4)      | 56.56#<br>(32.52-62.11)   | 25.56<br>(19.23-37.12)    |
| Fractalkine    | Median=<br>IQR (25th-75th)= | 379.2#<br>(198.1-558.1)     | 339.9#<br>(257.3-631.7)   | 653.4<br>(396.5-1,112)    |
| G-CSF          | Median=<br>IQR (25th-75th)= | 6.329*<br>(3.04-13.56)      | 28.62#<br>(6.86-142.8)    | 6.65<br>(4.29-9.49)       |
| GRO- $\alpha$  | Median=<br>IQR (25th-75th)= | 6.625*<br>(5.04-10.12)      | 16.43#<br>(9.14-52.26)    | 7.69<br>(6.69-8.76)       |
| IFN $\alpha$ 2 | Median=<br>IQR (25th-75th)= | 24.67*<br>(18.22-34.79)     | 17.06#<br>(6.61-21.72)    | 28.99<br>(13.87-50.23)    |
| IL-1 $\alpha$  | Median=<br>IQR (25th-75th)= | 42.9*<br>(31.72-79.91)      | 170.2#<br>(98.88-199.0)   | 58.35<br>(35.57-82.06)    |
| IL-1RA         | Median=<br>IQR (25th-75th)= | 146.6<br>(104.2-201.2)      | 231.5#<br>(99.63-278.6)   | 116.0<br>(73.85-163.0)    |
| IL-4           | Median=<br>IQR (25th-75th)= | 1.65*<br>(0.21-2.29)        | 0.26#<br>(0.16-0.58)      | 0.48<br>(0.23-2.42)       |
| IL-5           | Median=<br>IQR (25th-75th)= | 0.29<br>(0.24-0.43)         | 0.43<br>(0.24-0.61)       | 0.34<br>(0.25-0.41)       |
| IL-6           | Median=<br>IQR (25th-75th)= | 4.16<br>(0.50-40.36)        | 9.15#<br>(1.91-54.5)      | 1.46<br>(0.35-7.14)       |
| IL-8           | Median=<br>IQR (25th-75th)= | 15.76*<br>(9.48-40.23)      | 39.46#<br>(23.19-120.1)   | 17.18<br>(11.3-32.84)     |
| IL-9           | Median=<br>IQR (25th-75th)= | 11.55<br>(9.9-13.41)        | 13.6<br>(8.29-22.64)      | 12.33<br>(5.23-16.46)     |
| IL-10          | Median=                     | 0.71#                       | 0.95                      | 1.22                      |

|                |                             |                          |                         |                        |
|----------------|-----------------------------|--------------------------|-------------------------|------------------------|
|                | IQR (25th-75th)=            | (0.49-1.22)              | (0.69-1.45)             | (0.79-2.05)            |
| IL-12 p70      | Median=<br>IQR (25th-75th)= | 0.83#<br>(0.59-1.19)     | 1.03<br>(0.76-1.49)     | 0.99<br>(0.83-8.36)    |
| IL-15          | Median=<br>IQR (25th-75th)= | 20.57#<br>(16.37-24.9)   | 22.67<br>(19.46-27.19)  | 28.4<br>(22.21-31.75)  |
| IL-18          | Median=<br>IQR (25th-75th)= | 7.86*#<br>(4.89-63.38)   | 461.2#<br>(69.32-891.2) | 22.07<br>(8.79-141.2)  |
| MCP-1          | Median=<br>IQR (25th-75th)= | 139.9<br>(97.56-199.8)   | 161.5<br>(126.8-312.6)  | 160.6<br>(135.8-309.3) |
| MCP-3          | Median=<br>IQR (25th-75th)= | 7.71*#<br>(5.28-11.5)    | 11.83<br>(8.16-23.67)   | 12.06<br>(9.63-15.88)  |
| M-CSF          | Median=<br>IQR (25th-75th)= | 4,098*<br>(3,311-5,915)  | 5,583<br>(3,743-7,812)  | 4,462<br>(3,915-4,843) |
| CXCL9          | Median=<br>IQR (25th-75th)= | 48.95<br>(30.66-95.06)   | 40.92<br>(21.35-68.46)  | 46.43<br>(31.1-64.36)  |
| MIP-1 $\beta$  | Median=<br>IQR (25th-75th)= | 3.6<br>(2.04-6.58)       | 1.81#<br>(0.48-6.34)    | 5.88<br>(3.24-8.46)    |
| PDGF-AA        | Median=<br>IQR (25th-75th)= | 467.9*#<br>(370.2-627.7) | 666.6<br>(450.3-1,003)  | 637.7<br>(529.9-789.4) |
| RANTES         | Median=<br>IQR (25th-75th)= | 169.5*#<br>(82.09-274.3) | 61.54#<br>(27.58-149.6) | 322.0<br>(178.4-575.5) |
| TGF- $\alpha$  | Median=<br>IQR (25th-75th)= | 14.77<br>(9.21-19.08)    | 14.48<br>(6.17-22.8)    | 11.36<br>(6.19-16.62)  |
| VEG-F          | Median=<br>IQR (25th-75th)= | 8.54<br>(3.43-25.37)     | 8.21<br>(1.89-30.51)    | 6.18<br>(1.45-39.61)   |
| IP-10          | Median=<br>IQR (25th-75th)= | 1.25<br>(1.09-4.45)      | 22.9<br>(1.7-47.7)      | 3.05<br>(2.11-3.94)    |
| MDC            | Median=<br>IQR (25th-75th)= | 0.88<br>(0.57-1.59)      | 1.19<br>(0.67-1.51)     | 1.14<br>(0.77-1.6)     |
| TGF- $\beta$ 1 | Median=<br>IQR (25th-75th)= | 25.27<br>(15.15-48.89)   | 27.62<br>(11.47-51.0)   | 53.42<br>(26.07-110.2) |

\* p<0.05 compared with ASD

# p<0.05 compared with psychosis
