# Supplementary material for: Differential brain neuroimmune profiles and altered immune balance in autism spectrum disorder compared with psychotic disorder and neurotypical controls
Source: Research Square preprint supplement (doi:10.21203/rs.3.rs-9500684/v1), 2026-05-20
Supplement: Supplementary file 4 [file a4647f0cd96a79f846ff21d7.pdf]

| P values                                 |             |                           |                  |
|------------------------------------------|-------------|---------------------------|------------------|
|                                          | ASD vs CTRL | CTRL vs Psychosis         | ASD vs Psychosis |
| <b>EGF (13)</b>                          | 0.4312      | 0.0009                    | 0.1214           |
| <b>Eotaxin (14)</b>                      | 0.6682      | <0.0001                   | <0.0001          |
| <b>FGF-2 (15)</b>                        | 0.0469      | 0.0178                    | 0.951            |
| <b>FLT-3L (18)</b>                       | <0.0001     | 0.3756                    | <0.0001          |
| <b>Fractalkine (19)</b>                  | 0.6504      | 0.002                     | 0.0165           |
| <b>G-CSF (20)</b>                        | 0.008       | 0.862                     | 0.0063           |
| <b>GRO-<math>\alpha</math> (22)</b>      | 0.0019      | 0.3271                    | 0.0019           |
| <b>IFN<math>\alpha</math>2 (25)</b>      | 0.0065      | 0.5413                    | 0.0093           |
| <b>IL-1<math>\alpha</math> (27)</b>      | <0.0001     | 0.6134                    | <0.0001          |
| <b>IL-1RA (29)</b>                       | 0.1504      | 0.0958                    | 0.026            |
| <b>IL-4 (34)</b>                         | 0.0162      | 0.9267                    | 0.0194           |
| <b>IL-5 (35)</b>                         | 0.2487      | 0.4562                    | 0.4236           |
| <b>IL-6 (36)</b>                         | 0.281       | 0.1409                    | 0.0088           |
| <b>IL-8 (38)</b>                         | 0.0155      | 0.8309                    | 0.0094           |
| <b>IL-9 (39)</b>                         | 0.1813      | 0.5982                    | 0.4236           |
| <b>IL-10 (42)</b>                        | 0.2041      | 0.0214                    | 0.262            |
| <b>IL-12 (p70) (44)</b>                  | 0.1922      | 0.0493                    | 0.844            |
| <b>IL-15 (47)</b>                        | 0.0926      | 0.0013                    | 0.1019           |
| <b>IL-18</b>                             | <0.0001     | 0.0416                    | 0.0002           |
| <b>MCP-1 (61)</b>                        | 0.2336      | 0.2256                    | 0.9224           |
| <b>MCP-3 (62)</b>                        | 0.0104      | 0.0053                    | 0.63             |
| <b>M-CSF (63)</b>                        | 0.0469      | 0.5353                    | 0.1188           |
| <b>MDC (64)</b>                          | 0.8789      | 0.5525                    | 0.8678           |
| <b>MIG/CXCL9 (65)</b>                    | 0.2167      | 0.4099                    | 0.7537           |
| <b>MIP-1<math>\beta</math> (67)</b>      | 0.1917      | 0.0942                    | 0.0281           |
| <b>PDGF-AA (72)</b>                      | 0.02        | 0.0014                    | 0.7587           |
| <b>RANTES (74)</b>                       | 0.0035      | 0.005                     | <0.0001          |
| <b>TGF<math>\alpha</math> (75)</b>       | 0.9999      | 0.1708                    | 0.4987           |
| <b>VEGF-A (78)</b>                       | 0.843       | 0.9234                    | 0.7613           |
| <b>IP-10</b>                             | 0.0011      | 0.0412                    | 0.0689           |
| increased compared to TD                 |             | increased compared to ASD |                  |
| decreased compared to TD                 |             | decreased compared to ASD |                  |
| not significantly changed between groups |             |                           |                  |
