# Supplementary material for: Differential brain neuroimmune profiles and altered immune balance in autism spectrum disorder compared with psychotic disorder and neurotypical controls
Source: Research Square preprint supplement (doi:10.21203/rs.3.rs-9500684/v1), 2026-05-20
Supplement: Supplementary file 5 [file b0d458da808c7286e68a20f6.pdf]

| P values; TGFb ratio                     |             |                           |                  |
|------------------------------------------|-------------|---------------------------|------------------|
|                                          | ASD vs CTRL | CTRL vs Psychosis         | ASD vs Psychosis |
| <b>EGF (13)</b>                          | 0.6665      | 0.0159                    | 0.0154           |
| <b>Eotaxin (14)</b>                      | 0.4489      | 0.9593                    | 0.5778           |
| <b>FGF-2 (15)</b>                        | 0.1651      | 0.5601                    | 0.1069           |
| <b>FLT-3L (18)</b>                       | 0.0143      | 0.0249                    | <0.0001          |
| <b>Fractalkine (19)</b>                  | 0.6923      | 0.6655                    | 0.8545           |
| <b>G-CSF (20)</b>                        | 0.0143      | 0.0208                    | <0.0001          |
| <b>GRO-<math>\alpha</math>(22)</b>       | 0.1547      | 0.0077                    | <0.0001          |
| <b>IFN<math>\alpha</math>2 (25)</b>      | 0.2028      | 0.7688                    | 0.3298           |
| <b>IL-1<math>\alpha</math> (27)</b>      | 0.0003      | 0.4419                    | <0.0001          |
| <b>IL-1RA (29)</b>                       | 0.284       | 0.0046                    | 0.0009           |
| <b>IL-4 (34)</b>                         | 0.0622      | 0.3152                    | 0.567            |
| <b>IL-5 (35)</b>                         | 0.9467      | 0.0831                    | 0.1386           |
| <b>IL-6 (36)</b>                         | 0.4838      | 0.0071                    | 0.0005           |
| <b>IL-8 (38)</b>                         | 0.2238      | 0.009                     | 0.0009           |
| <b>IL-9 (39)</b>                         | 0.2738      | 0.0264                    | 0.0095           |
| <b>IL-10 (42)</b>                        | 0.2538      | 0.5578                    | 0.1911           |
| <b>IL-12 (p70) (44)</b>                  | 0.8284      | 0.5191                    | 0.5109           |
| <b>IL-15 (47)</b>                        | 0.1881      | 0.1884                    | 0.0219           |
| <b>IL-18 (54)</b>                        | <0.0001     | 0.6507                    | <0.0001          |
| <b>MCP-1 (61)</b>                        | 0.1385      | 0.2596                    | 0.0132           |
| <b>MCP-3 (62)</b>                        | 0.2268      | 0.2768                    | 0.0651           |
| <b>M-CSF (63)</b>                        | 0.1817      | 0.1236                    | 0.0201           |
| <b>MDC (64)</b>                          | 0.7222      | 0.2759                    | 0.3006           |
| <b>MIG/CXCL9 (65)</b>                    | 0.0095      | 0.0002                    | 0.9224           |
| <b>MIP-1<math>\beta</math> (67)</b>      | 0.5094      | 0.0571                    | 0.7455           |
| <b>PDGF-AA (72)</b>                      | 0.3676      | 0.7515                    | 0.2456           |
| <b>RANTES (74)</b>                       | 0.5144      | 0.4935                    | 0.2358           |
| <b>TGF<math>\alpha</math> (75)</b>       | 0.654       | 0.099                     | 0.3602           |
| <b>VEGF-A (78)</b>                       | 0.9878      | 0.272                     | 0.2937           |
| <b>IP-10</b>                             | 0.0049      | 0.3408                    | 0.0253           |
| increased compared to TD                 |             | increased compared to ASD |                  |
| decreased compared to TD                 |             | decreased compared to ASD |                  |
| not significantly changed between groups |             |                           |                  |
